# Supplementary material for: Quality of Life and Social Support of People on Peritoneal Dialysis: Mixed Methods Research
Source: MDPI journal article supplement (doi:10.3390/ijerph17124240), 2020-06-14
Supplement: s1 [file s1]

**Table S1:** Relationship between the physical limitations dimension of the KDQOL-SF™ instrument and the social support dimensions of the MOS survey

| KDQOL-SF™(physical limitations dimensions)                                                                | Emotional and informational support | <i>p</i> | Instrumental support and support material | <i>p</i> | Positive social interaction | <i>p</i> | Affective support | <i>p</i> |
|-----------------------------------------------------------------------------------------------------------|-------------------------------------|----------|-------------------------------------------|----------|-----------------------------|----------|-------------------|----------|
| <i>Had to reduce the time dedicated to work or his or her daily activities</i>                            |                                     |          |                                           |          |                             |          |                   |          |
| Yes (n:19)                                                                                                |                                     |          |                                           |          |                             |          |                   |          |
| No (n:36)                                                                                                 | 4.03 (0.93)                         | 0.337    | 4.26 (1.09)                               | 0.088    | 3.71 (1.01)                 | 0.662    | 4.22 (0.92)       | 0.508    |
|                                                                                                           | 4.19 (0.91)                         |          | 4.43 (1.10)                               |          | 3.75 (1.19)                 |          | 4.24 (1.14)       |          |
| <i>Did less than he or she would have liked</i>                                                           |                                     |          |                                           |          |                             |          |                   |          |
| Yes (n:29)                                                                                                | 3.87 (0.93)                         | 0.011    | 4.03 (1.26)                               | 0.001    | 3.44 (1.14)                 | 0.033    | 3.93 (1.03)       | 0.001    |
| No (n:26)                                                                                                 | 4.43 (0.80)                         |          | 4.75 (0.73)                               |          | 4.06 (1.02)                 |          | 4.57 (1.02)       |          |
| <i>Had to stop doing some tasks in his or her work or daily activities</i>                                |                                     |          |                                           |          |                             |          |                   |          |
| Yes (n:20)                                                                                                |                                     |          |                                           |          |                             |          |                   |          |
| No (n:35)                                                                                                 | 3.79 (0.92)                         | 0.013    | 3.77 (1.37)                               | <0.001   | 3.47 (0.98)                 | 0.084    | 3.78 (1.09)       | 0.003    |
|                                                                                                           | 4.33 (0.85)                         |          | 4.71 (0.72)                               |          | 3.89 (1.11)                 |          | 4.49 (0.97)       |          |
| <i>Had difficulty in doing his or her work or daily activities (e.g. it took more effort than normal)</i> |                                     |          |                                           |          |                             |          |                   |          |
| Yes (n:25)                                                                                                | 3.78 (1)                            | 0.010    | 4.07 (1.25)                               | 0.008    | 3.25 (1.17)                 | 0.004    | 3.84 (1.04)       | 0.001    |
| No (n:30)                                                                                                 | 4.43 (0.72)                         |          | 4.62 (0.88)                               |          | 4.15 (0.91)                 |          | 4.56 (0.99)       |          |

Mann–Whitney U test \*The quantitative variables are described with the mean and with the standard deviation in parentheses

**Table S2:** Relationship between the emotional limitation dimensions of the KDQOL-SF™ instrument and the social support dimensions of the MOS survey

| KDQOL-SF™(emotional limitations dimension)                                                                                               | Emotional and informational support | <i>p</i> | Instrumental support and support material | <i>p</i> | Positive social interaction | <i>p</i> | Affective support          | <i>p</i> |
|------------------------------------------------------------------------------------------------------------------------------------------|-------------------------------------|----------|-------------------------------------------|----------|-----------------------------|----------|----------------------------|----------|
| <i>Had to reduce the time dedicated to work or daily activities due to an emotional problem</i><br><br>Yes (n:13)<br>No (n:42)           | 3.58 (0.83)<br>4.30 (0.87)          | 0.005    | 3.59 (1.50)<br>4.61 (0.81)                | 0.005    | 3.28 (0.97)<br>3.88 (1.13)  | 0.053    | 3.35 (1.10)<br>4.50 (0.91) | 0.000    |
| <i>Did less than he or she would have wanted due to an emotional problem</i><br><br>Yes (n:12)<br>No (n:43)                              | 3.77 (0.83)<br>4.24 (0.91)          | 0.043    | 3.68 (1.53)<br>4.56 (0.86)                | 0.018    | 3.37 (0.94)<br>3.84 (1.15)  | 0.116    | 3.58 (1.20)<br>4.41 (0.96) | 0.013    |
| <i>Had to stop doing some tasks at work or in his or her daily activities due to an emotional problem</i><br><br>Yes (n:13)<br>No (n:42) | 4.10 (0.83)<br>4.14 (0.94)          | 0.637    | 3.80 (1.55)<br>4.54 (0.85)                | 0.216    | 3.51 (1.06)<br>3.80 (1.14)  | 0.318    | 4.05 (1.10)<br>4.29 (1.06) | 0.308    |

Mann–Whitney U test \*The quantitative variables are described with the mean and with the standard deviation in parentheses

**Table S3:** Correlation between the physical and mental component of the SF-36, emotional support, instrumental support, affective support, cognitive function, sexual function, problems and symptoms, discomforting effects of the kidney disease, the burden of the kidney disease and social support

|                                    | 1 | 2   | 3       | 4       | 5       | 6        | 7       | 8        | 9        | 10       | 11       |
|------------------------------------|---|-----|---------|---------|---------|----------|---------|----------|----------|----------|----------|
| <b>1.Physical comp.SF-36</b>       | 1 | 0.6 | 0.284*  | 0.127   | 0.337*  | -0.397** | 0.107   | 0.437**  | 0.344*   | 0.288*   | 0.233    |
| <b>2.Mental comp. SF-36</b>        |   | 1   | 0.388** | 0.24    | 0.306*  | -0.586** | 0.25    | 0.364**  | 0.611**  | 0.649**  | 0.407**  |
| <b>3.Emocional support</b>         |   |     | 1       | 0.367** | 0.759** | -0.357** | 0.26    | 0.155    | 0.389**  | 0.290*   | 0.599**  |
| <b>4. Instrumental support</b>     |   |     |         | 1       | 0.479** | -0.262   | 0.276*  | 0.241    | 0.212    | 0.051    | 0.442**  |
| <b>5.Affective support</b>         |   |     |         |         | 1       | -0.417** | 0.203   | 0.249    | 0.298*   | 0.268*   | 0.646**  |
| <b>6. Cognitive function</b>       |   |     |         |         |         | 1        | -0.332* | -0.595** | -0.579** | -0.463** | -0.386** |
| <b>7.Sexual function</b>           |   |     |         |         |         |          | 1       | 0.151    | 0.628**  | 0.194    | 0.277*   |
| <b>8.Problems and symptoms</b>     |   |     |         |         |         |          |         | 1        | 0.477**  | 0.305*   | 0.26     |
| <b>9.Discomforting effects</b>     |   |     |         |         |         |          |         |          | 1        | 0.602**  | 0.380**  |
| <b>10.Burden of kidney disease</b> |   |     |         |         |         |          |         |          |          | 1        | 0.235    |
| <b>11.Social support</b>           |   |     |         |         |         |          |         |          |          |          | 1        |

*Spearman's Rho test* \* Statistical significance  $p < 0.05$ ; \*\* Statistical significance  $p < 0.001$
